# Supplementary material for: Metal-deposited bismuth oxyiodide nanonetworks with tunable enzyme-like activity: sensing of mercury and lead ions
Source: Royal Society of Chemistry journal article supplement (doi:10.1039/c6qm00149a), 2016-12-07
Supplement: c6qm00149a1.pdf [file c6qm00149a1.pdf]

## *Supplementary Information*

### **Metal-deposited bismuth oxyiodide nanonetworks with tunable enzyme-like activity: sensing of mercury and lead ions**

Chia-Lun Hsu,<sup>a</sup> Chia-Wen Lien,<sup>a</sup> Scott G. Harroun,<sup>b</sup> Rini Ravindranath,<sup>ac</sup> Huan-Tsung Chang,<sup>\*ad</sup>,

Ju-Yi Mao,<sup>e</sup> and Chih-Ching Huang<sup>\*efg</sup>

<sup>a</sup>Department of Chemistry, National Taiwan University, Taipei, 10617, Taiwan

<sup>b</sup>Department of Chemistry, Université de Montréal, Montreal, Quebec, H3C 3J7, Canada

<sup>c</sup>Nanoscience and Technology Program, Taiwan International Graduate Program, Academia Sinica, Taipei 11529, Taiwan

<sup>d</sup>Department of Chemistry, Chung Yuan Christian University, Chungli District, Taoyuan City, 32023, Taiwan

<sup>e</sup>Department of Bioscience and Biotechnology, National Taiwan Ocean University, Keelung, 20224, Taiwan

<sup>f</sup>Center of Excellence for the Oceans, National Taiwan Ocean University, Keelung, 20224, Taiwan

<sup>g</sup>School of Pharmacy, College of Pharmacy, Kaohsiung Medical University, Kaohsiung, 80708, Taiwan

**Correspondence:** Huan-Tsung Chang, Department of Chemistry, National Taiwan University, 1, Section 4, Roosevelt Road, Taipei 10617, Taiwan; Tel. and fax: 011-886-2-3366-1171; e-mail: changht@ntu.edu.tw; Chih-Ching Huang, Department of Bioscience and Biotechnology, National Taiwan Ocean University, 2, Beining Road, Keelung 20224, Taiwan; Tel.: 011-886-2-2462-2192 ext: 5517; Fax: 011-886-2-2462-2034; e-mail: huanging@ntou.edu.tw

**Table S1.** Elemental ratio (Bi/X; X = Cl, Br or I) analysis of BiOX nanostructures by XPS, ICP-OES or ICP-MS.

| <b>Nanostructures</b> | <b>XPS</b> | <b>Bi/X (ICP-OES or ICP-MS)</b> |
|-----------------------|------------|---------------------------------|
| <b>BiOCl</b>          | 7.2        | 4.9 <sup>a</sup>                |
| <b>BiOBr</b>          | 7.0        | 5.5 <sup>b</sup>                |
| <b>BiOI</b>           | 3.4        | 2.2 <sup>b</sup>                |

<sup>a</sup>Determined by ICP-OES. <sup>b</sup>Determined by ICP-MS.

**Table S2.** Analytical results for the detection of Hg<sup>2+</sup> and Pb<sup>2+</sup>-spiked water samples by O<sub>2</sub>/AR–Au NPs/BiOI nanocomposites and H<sub>2</sub>O<sub>2</sub>/AR–NiO NPs/BiOI nanocomposites sensing systems, respectively.

| Probe                                                      | Real sample                                                              | Added Hg <sup>2+</sup> (nM) | Found Hg <sup>2+</sup> (nM) | Recovery                    | RSD (n = 3) |             |
|------------------------------------------------------------|--------------------------------------------------------------------------|-----------------------------|-----------------------------|-----------------------------|-------------|-------------|
| <b>O<sub>2</sub>/AR–Au<br/>NPs/BiOI<br/>nanocomposites</b> | Tap water                                                                | 20                          | 20.7                        | 104%                        | 6.8%        |             |
|                                                            |                                                                          | 100                         | 99.9                        | 99.9%                       | 6.7%        |             |
|                                                            |                                                                          | 500                         | 539                         | 108%                        | 6.8%        |             |
|                                                            | River water                                                              | 20                          | 19.5                        | 97.5%                       | 5.9%        |             |
|                                                            |                                                                          | 100                         | 106                         | 106%                        | 5.2%        |             |
|                                                            |                                                                          | 500                         | 529                         | 106%                        | 5.3%        |             |
|                                                            | Lake water                                                               | 20                          | 20.4                        | 102%                        | 7.3%        |             |
|                                                            |                                                                          | 100                         | 104                         | 104%                        | 5.1%        |             |
|                                                            |                                                                          | 500                         | 559                         | 112%                        | 2.3%        |             |
|                                                            | Sea water                                                                | 20                          | 22.1                        | 111%                        | 8.0%        |             |
|                                                            |                                                                          | 100                         | 99.4                        | 99.4%                       | 6.9%        |             |
|                                                            |                                                                          | 500                         | 555                         | 111%                        | 4.0%        |             |
|                                                            | Probe                                                                    | Real sample                 | Added Pb <sup>2+</sup> (nM) | Found Pb <sup>2+</sup> (nM) | Recovery    | RSD (n = 3) |
|                                                            | <b>H<sub>2</sub>O<sub>2</sub>/AR–NiO<br/>NPs/BiOI<br/>nanocomposites</b> | Tap water                   | 20                          | 18.8                        | 94.0%       | 7.8%        |
|                                                            |                                                                          |                             | 100                         | 96.3                        | 96.3%       | 7.8%        |
| 500                                                        |                                                                          |                             | 545                         | 109%                        | 7.5%        |             |
| River water                                                |                                                                          | 20                          | 21.5                        | 108%                        | 7.5%        |             |
|                                                            |                                                                          | 100                         | 106                         | 106%                        | 8.2%        |             |
|                                                            |                                                                          | 500                         | 533                         | 107%                        | 6.0%        |             |
| Lake water                                                 |                                                                          | 20                          | 19.4                        | 97.0%                       | 8.2%        |             |
|                                                            |                                                                          | 100                         | 112                         | 112%                        | 7.2%        |             |
|                                                            |                                                                          | 500                         | 548                         | 110%                        | 4.7%        |             |
| Sea water                                                  |                                                                          | 20                          | 20.9                        | 105%                        | 7.4%        |             |
|                                                            |                                                                          | 100                         | 107                         | 107%                        | 6.2%        |             |
|                                                            |                                                                          | 500                         | 556                         | 111%                        | 8.0%        |             |

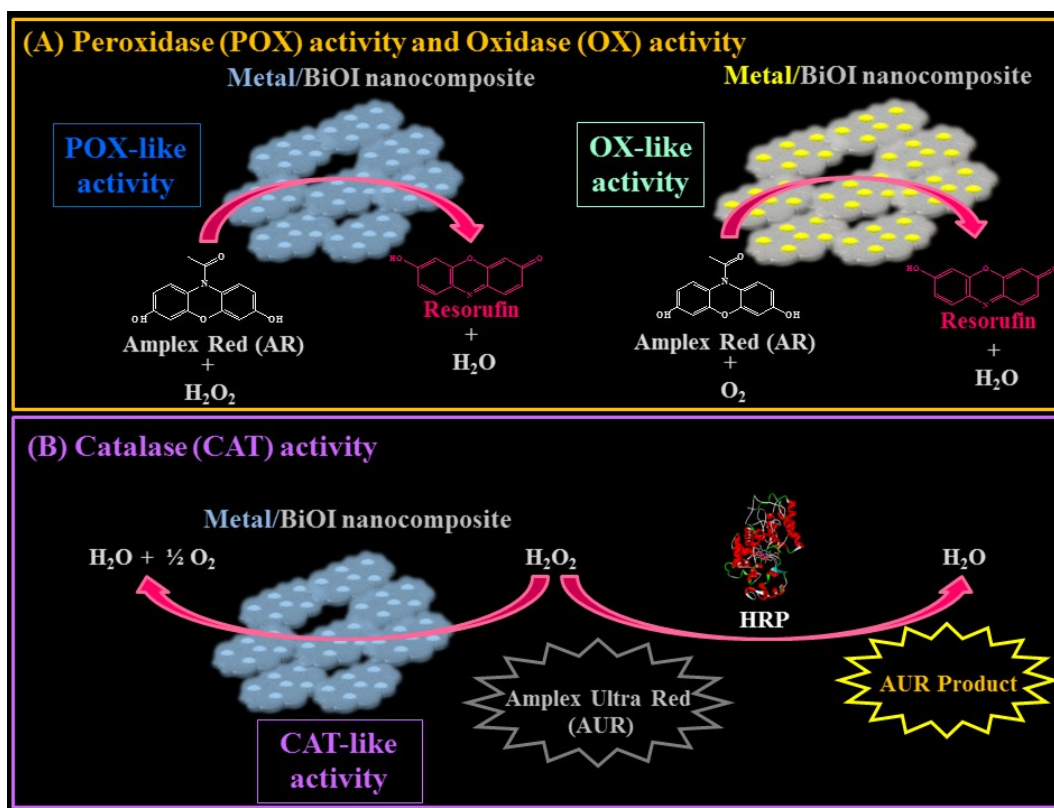

**Scheme S1.** Schematic representation of the evaluation of metal-deposited BiOI having (A) POX- and OX- and (B) CAT-like activities.

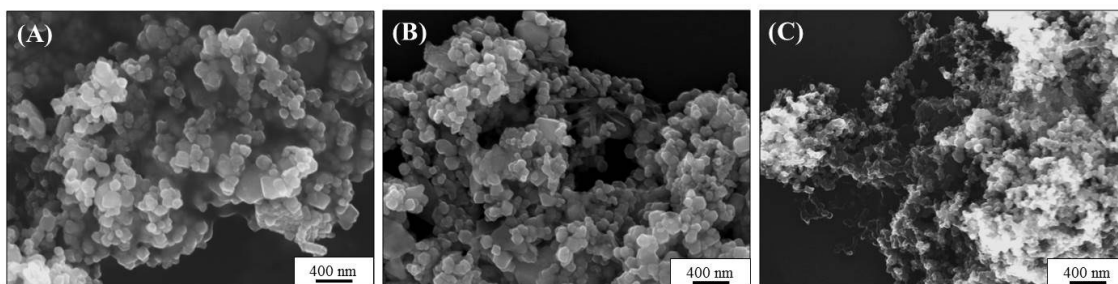

**Figure S1.** SEM images of as-prepared (A) BiOCl nanosheets, (B) BiOBr nanosheets, and (C) BiOI nanonetworks.

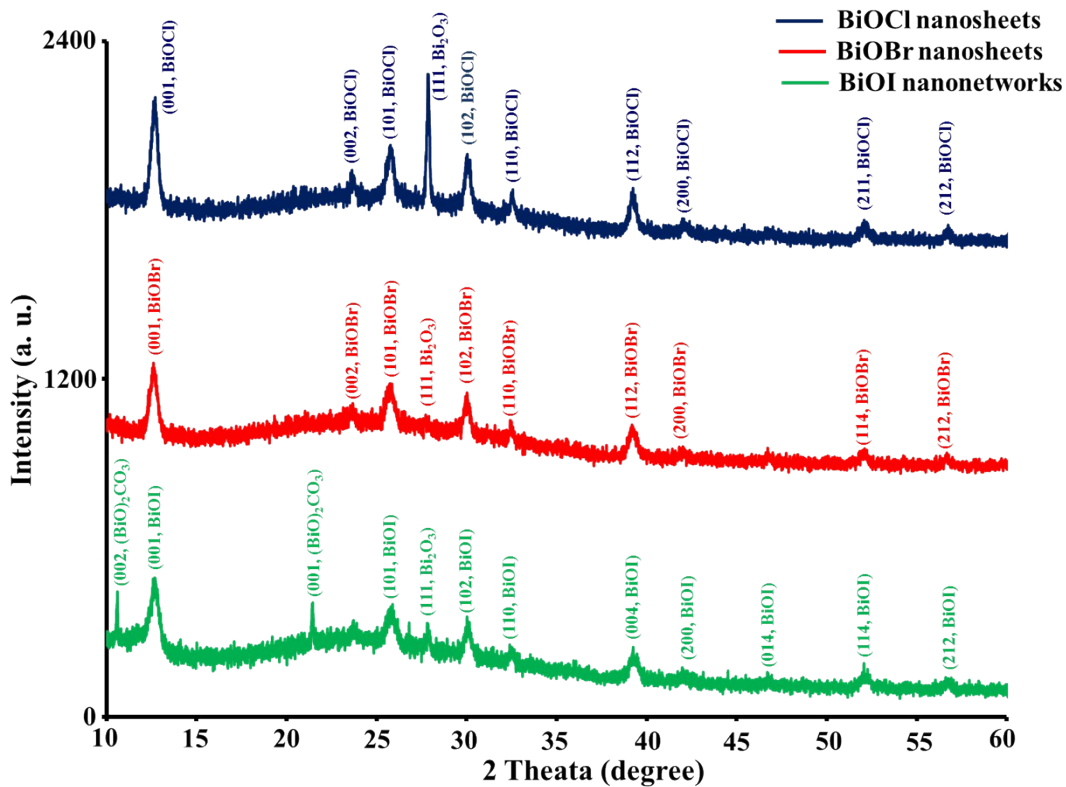

**Figure S2.** XRD patterns of as-prepared (A) BiOCl nanosheets, (B) BiOBr nanosheets, and (C) BiOI nanonetworks.

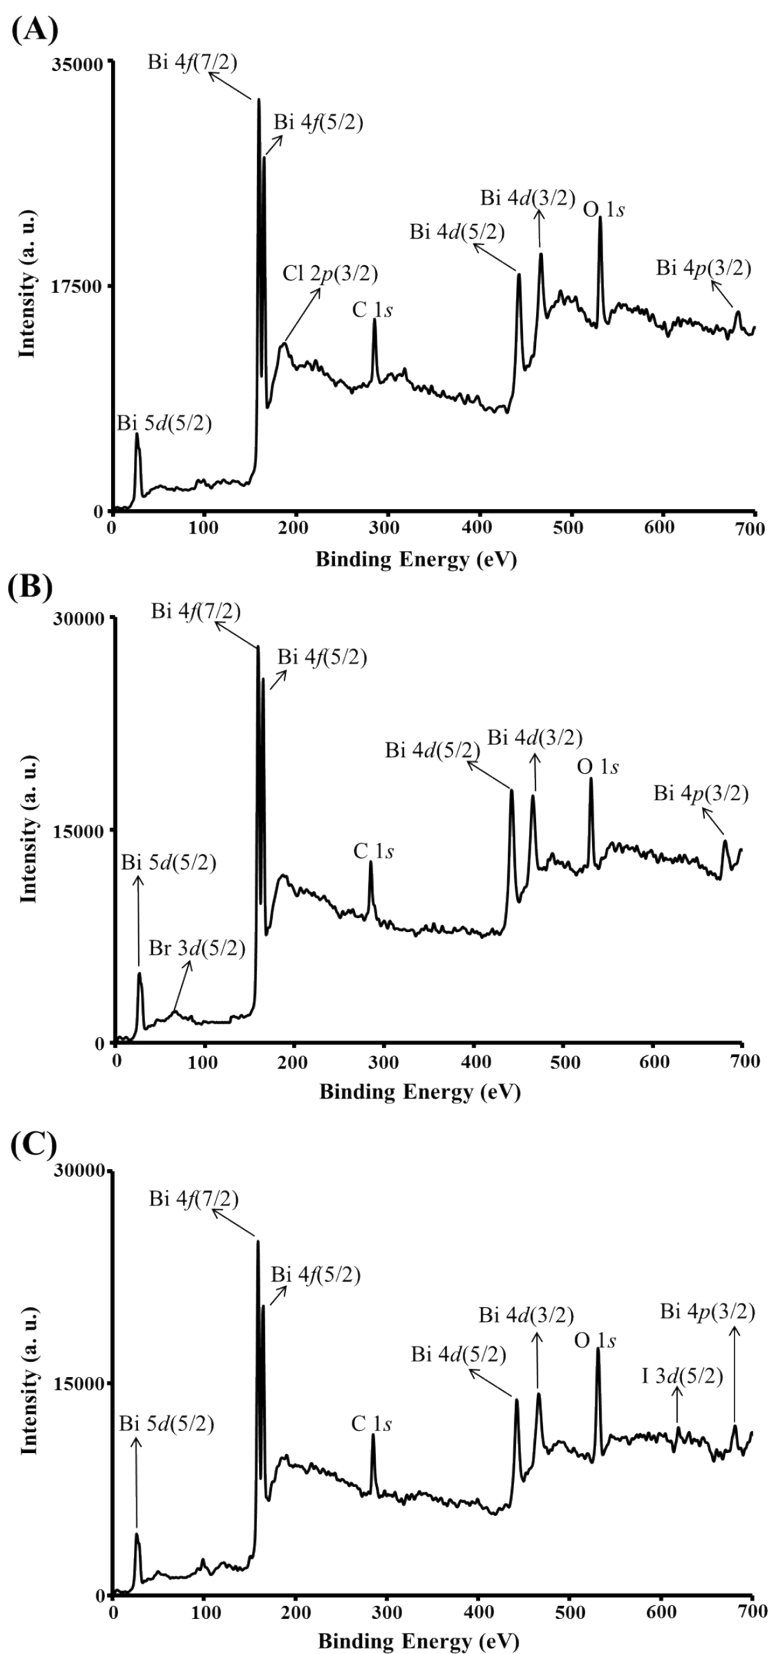

**Figure S3.** Survey scan XPS spectra of as-prepared (A) BiOCl nanosheets, (B) BiOBr nanosheets, and (C) BiOI nanonetworks.

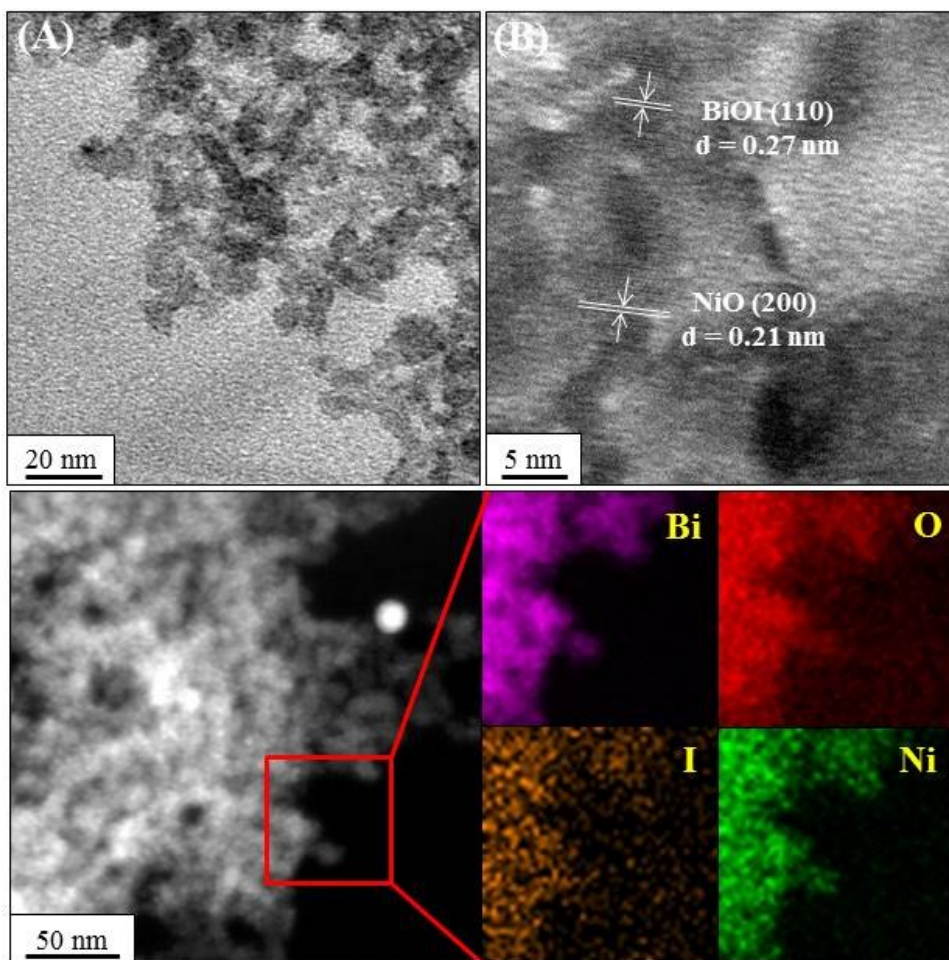

**Figure S4.** (A) TEM image, (B) HRTEM image, and (C) high-angle annular dark-field scanning TEM mapping images of NiO NPs/BiOI nanocomposites.



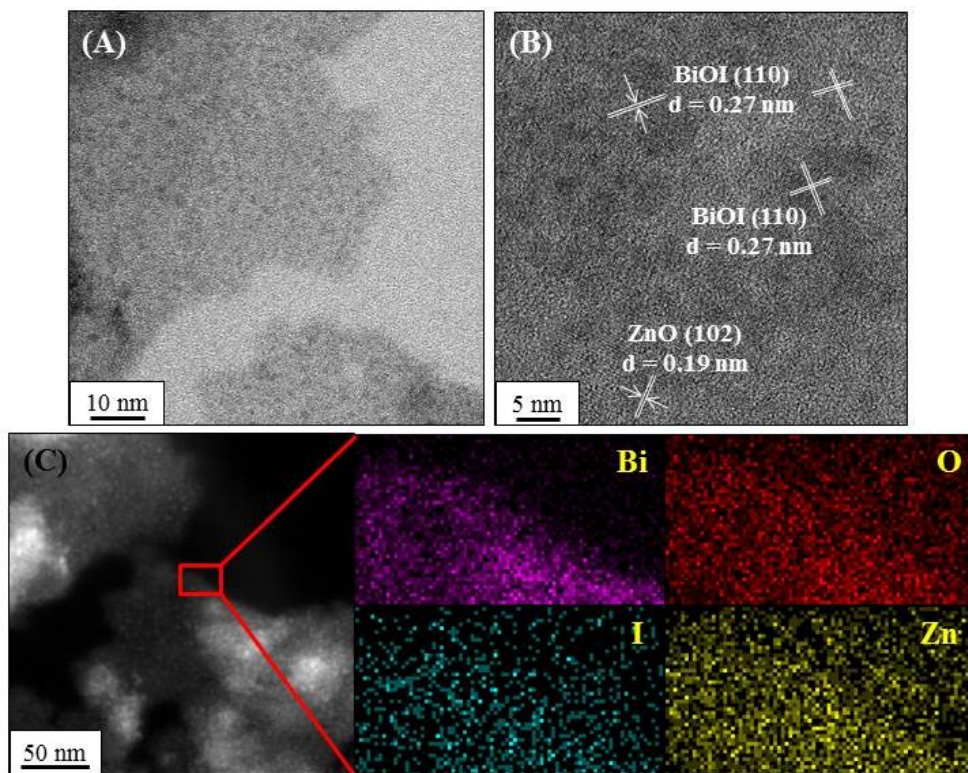

**Figure S5.** (A) TEM image, (B) HRTEM image, and (C) high-angle annular dark-field scanning TEM mapping images of ZnO NPs/BiOI nanocomposites.

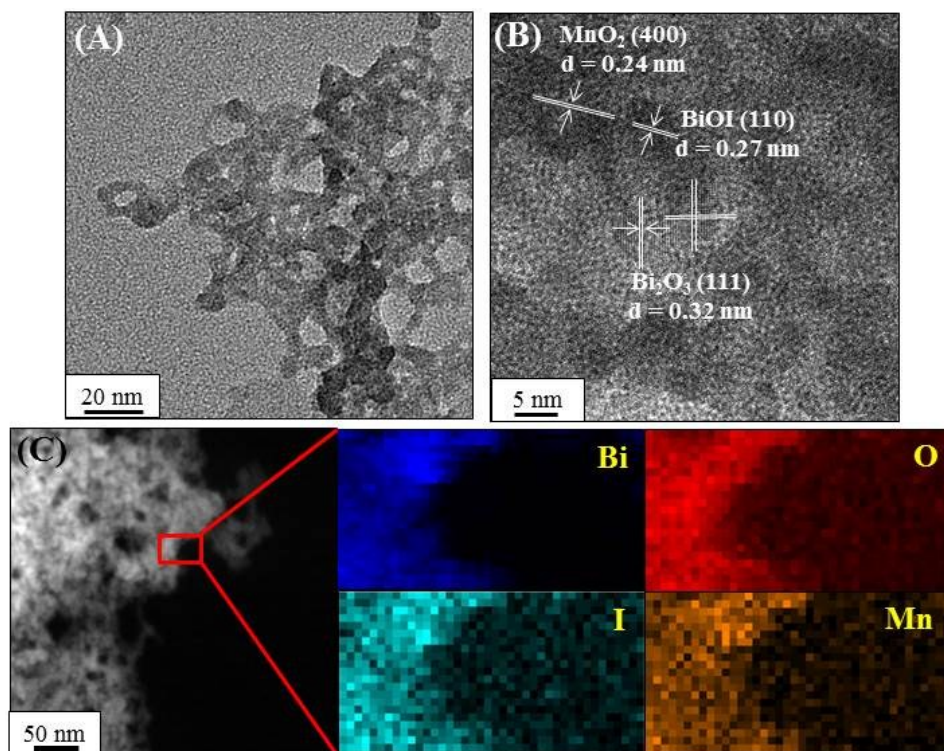

**Figure S6.** (A) TEM image, (B) HRTEM image, and (C) high-angle annular dark-field scanning TEM mapping images of MnO<sub>2</sub> NPs/BiOI nanocomposites.
